# Supplementary material
Source: PubMed Central journal article supplement (PMC3542243)
Supplement: cbt-13-1512-s01.pdf [file cbt-13-1512-s01.pdf]

## **Supplemental Material to:**

**Yasushi Sasaki, Ryota Koyama, Reo Maruyama, Takehiro  
Hirano, Miyuki Tamura, Jun Sugisaka, Hiromu  
Suzuki, Masashi Idogawa, Yasuhisa  
Shinomura and Takashi Tokino**

**CLCA2, a target of the p53 family, negatively regulates  
cancer cell migration and invasion**

**Cancer Biology & Therapy 2012; 13(14)**

**<http://dx.doi.org/10.4161/cbt.22280>**

**<http://www.landesbioscience.com/journals/cbt/article/22280>**

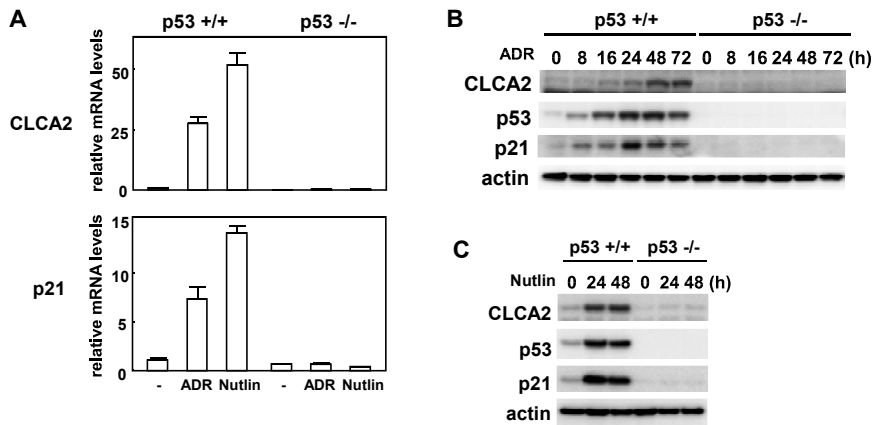

**Supplementary Fig. S1**

**Endogenous p53 up-regulates CLCA2 mRNA and protein levels**

A) HCT116-p53(+/+) and HCT116-p53(-/-) cells were treated with ADR (Sigma, 0.2  $\mu$ g/mL) or Nutlin-3 (Sigma, 10  $\mu$ M) for 24 h. *CLCA2* and *p21* mRNA levels were assayed by real-time PCR. Values shown are the means  $\pm$  standard errors of three independent experiments normalized to their respective controls as 1.

B, C) HCT116-p53(+/+) and HCT116-p53(-/-) cells were treated with 0.2  $\mu$ g/ml ADR (B) or 10  $\mu$ M Nutlin-3 for the indicated time (hours), and immunoblot analysis of *CLCA2*, p53, p21 and  $\beta$ -actin was performed.

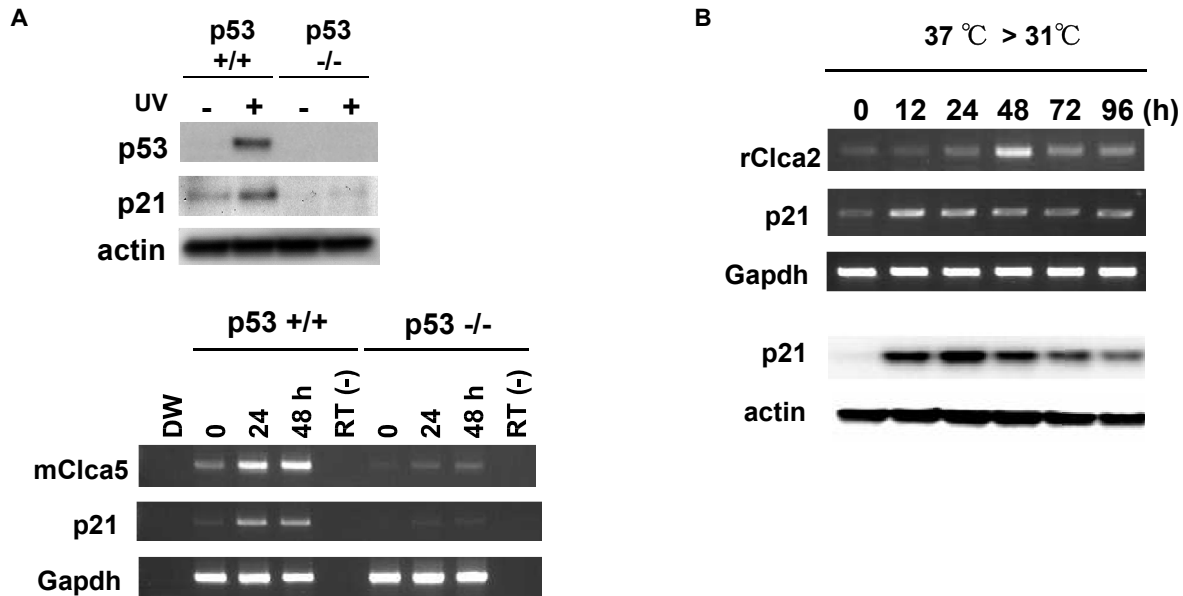

### Supplementary Fig. S2

#### Expression of *CLCA2* mRNA is induced in mouse and rat fibroblasts in a wild-type p53-dependent manner

A) Upper panel, mouse embryonic fibroblasts (MEFs) from p53(+/+) mice and p53(-/-) mice were provided by Dr Motoya Katsuki (National Institute for Basic Biology, Japan). Cell lysates were prepared 24 h after the UV treatment (50 J/m<sup>2</sup>). Immunoblot analysis was performed using antibodies against p53 (1C12, Cell Signaling), p21 (F-5, Santa Cruz Biotechnology) and  $\beta$ -actin. Lower panel, semi-quantitative RT-PCR analysis of *mClca5* mRNA following UV radiation in MEFs derived from p53(+/+) and p53(-/-) mice. Cells were treated with UV (50 J/m<sup>2</sup>) for the indicated time and subjected to semi-quantitative RT-PCR analysis of *mCLCA5*. *Gapdh* mRNA levels were examined as a control for cDNA integrity. Distilled water (DW) and total RNA untreated with reverse transcriptase (RT (-)) were used as negative controls.

B) Semi-quantitative RT-PCR analysis of *rCLCA2* in REFp53vahCLCA25 cells following thermoshift. Cells were incubated at 31° C (wild-type p53 conformation). Total RNA was prepared from cells at 0, 12, 24, 48, 72, and 96 h following thermoshift and subjected to RT-PCR analysis of *rClca2*. In addition, immunoblot analysis was performed on a known p53-target, p21, and  $\beta$ -actin.

Oligonucleotide primer sequences were as follows:

mouse *Clca5* sense 5'- TTTTGGATGGCGGAGCAGGTG-3',  
 mouse *Clca5* antisense 5'- GGGTGACAAGCTTGGGTGAGAATG-3',  
 mouse and rat *p21* sense 5'- GCCCGAGAACGGTGGAACTTT-3',  
 mouse and rat *p21* antisense 5'- CCTCCTGACCCACAGCAGAA-3',  
 rat *Clca2* sense 5'- ACCCACCATTCTCCTCAAGCTCTG-3',  
 rat *Clca2* antisense 5'- AAGTCCCACCGCTCCTTCAACA-3',  
 mouse and rat *Gapdh* sense 5'-ACCACAGTCCATGCCATCAC-3',  
 and mouse and rat *Gapdh* antisense 5'-TCCACCACCCTGTTGCTGTA-3'.

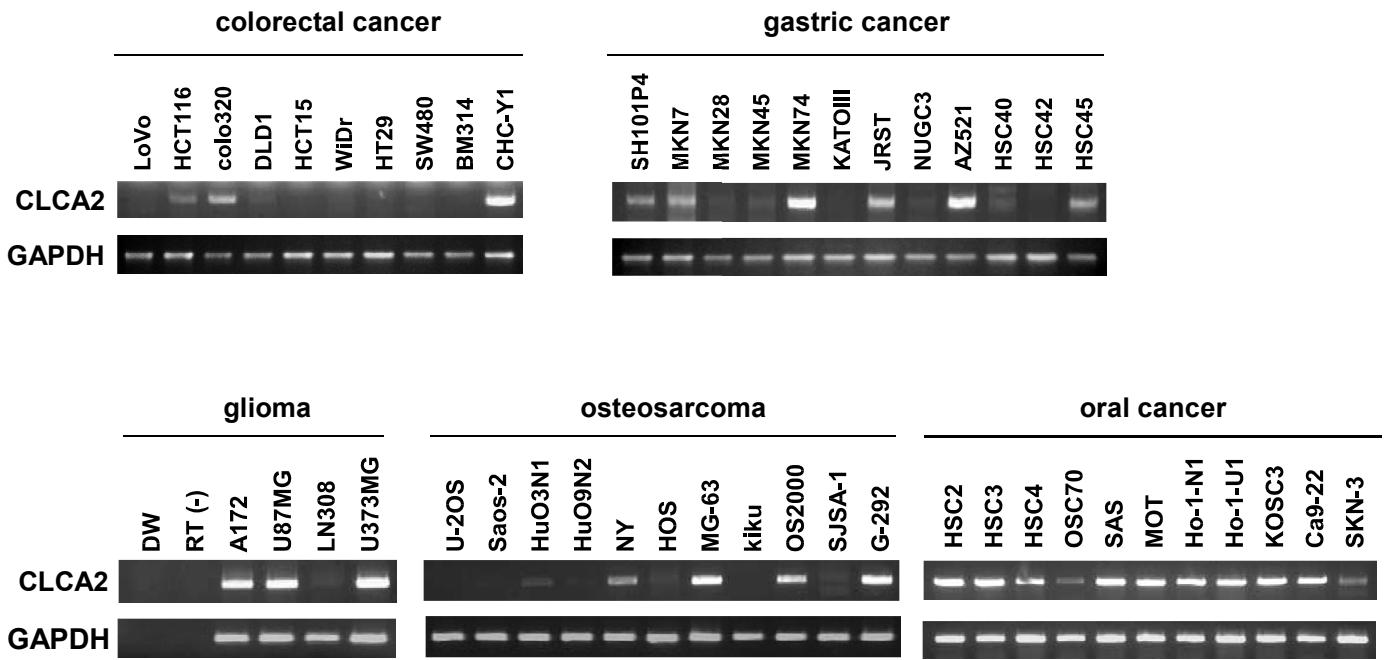

**Supplementary Fig. S3**

**Expression of endogenous *CLCA2* mRNA in human cancer cell lines**

Semi-quantitative RT-PCR analysis was performed using primers for *CLCA2* (5'-GGGCTTAAGAAAGGATTTGAGGTGGT-3' and 5'-ACAGGATGAGGAAAATGGAGGCTGT-3') and *GAPDH* (5'-ACCACAGTCCATGCCATCAC-3' and 5'-TCCACCACCCTGTTGCTGTA-3').

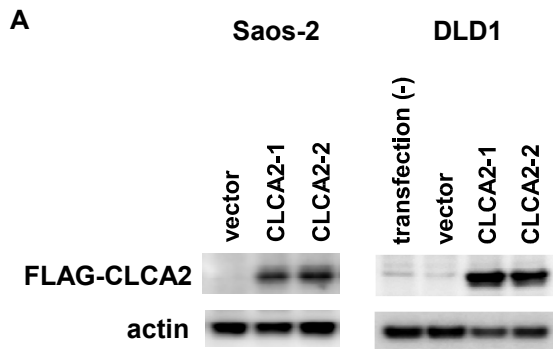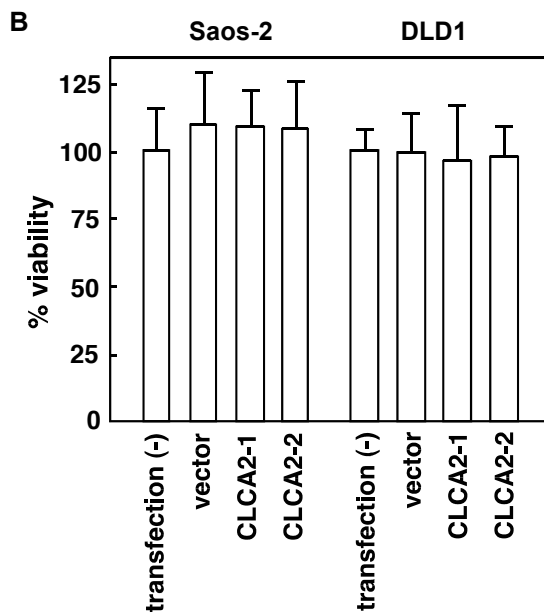

**Supplementary Fig. S4**

**Overexpression of CLCA2 does not inhibit cancer cell growth**

A) Saos-2 or DLD1 cells were transiently transfected with CLCA2 expression vector pReceiver-M11-CLCA2 containing a FLAG epitope tag (two populations) or empty vector plasmid (vector). At 24 h after transfection, cell lysates were prepared, and the expression of FLAG-CLCA2 was detected by Western blotting.

B) Saos-2 and DLD1 cells were transfected as described above. After 24 h, cell viability was assessed by the uptake of tritium thymidine using a 3-(4,5-dimethylthiazol-2-yl)-2,5-diphenyltetrazolium bromide (MTT) assay. The assay was performed in triplicate with a Cell Counting Kit-8 (Dojindo, Tokyo, Japan) according to the manufacturer's instructions. Error bars equal one standard error.

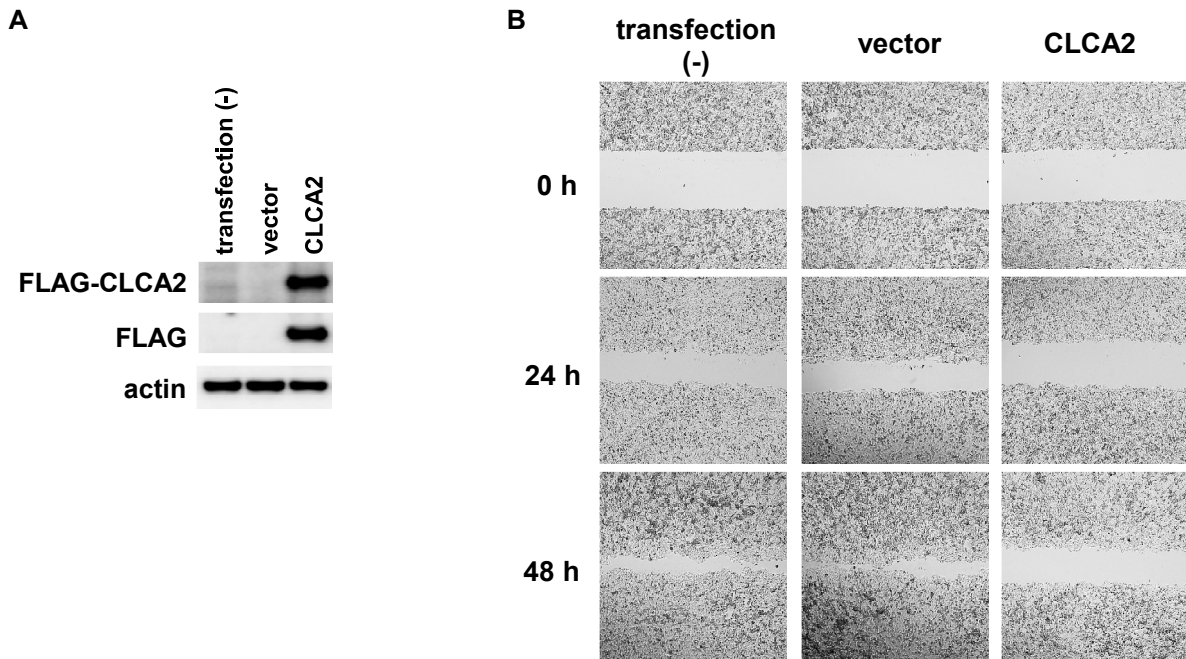

**Supplementary Fig. S5**

**Overexpression of CLCA2 inhibits cancer cell migration**

A) Western blot analysis after stable transfection of CLCA2 expression vector containing a FLAG epitope tag or an empty vector in Saos-2 cells.

B) Wound healing assay of Saos-2 cells following the stable transfection of CLCA2 expression vector. A transfected Saos-2 cell monolayer on collagen-coated coverslips was scratched manually with a plastic pipette tip. Cells were washed with fresh medium to remove floating cells, and phase contrast images were taken 0, 24 and 48 h after wounding. Representative images show decreased cell migration to the wounded area in CLCA2-overexpressing Saos-2 cells.

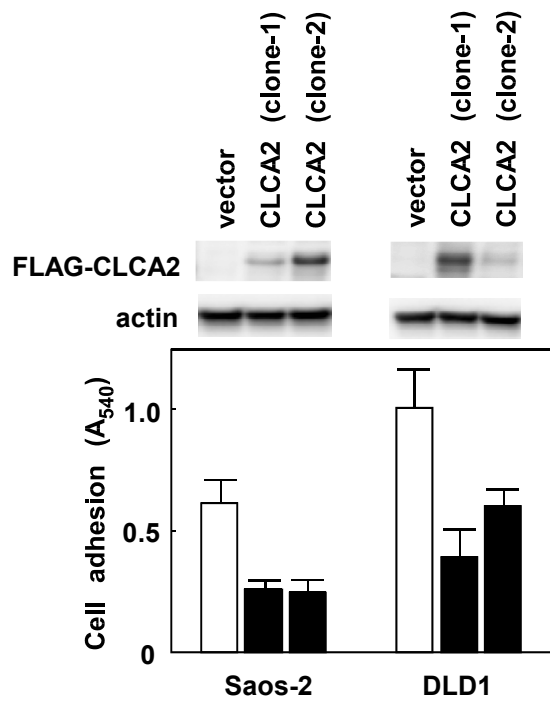

### Supplementary Fig. S6

#### Overexpression of CLCA2 inhibits cancer cell adhesion

Tissue culture plates (96 wells) were coated for 2 h at 37° C with fibronectin at 10 µg/ml. Subsequently, an equal number of stably transfected cells (1 X 10<sup>5</sup>/ml) in a FBS-free medium were added per well and allowed to adhere for 30 min. The adherent cells were fixed with 200 µl of cold 70% ethanol, stained with 0.1% crystal violet, and washed three times with water. Finally, the cells were incubated for 1 h with 2% SDS to solubilize the crystal violet. Absorbance was measured at 540 nm.

Upper panels show the immunoblot analysis of FLAG-CLCA2 with β-actin as a loading control in cells after stable transfection of CLCA2 expression vector containing a FLAG epitope tag or empty vector. The results from pooled controls and two individual CLCA2 transfectant clones are shown.
